## Comparison of bacterial genome assembly software for MinION data

Kim Judge,<sup>1\*</sup> Martin Hunt,<sup>2</sup> Sandra Reuter,<sup>1</sup> Alan Tracey,<sup>2</sup> Michael A. Quail,<sup>2</sup> Julian Parkhill,<sup>2</sup> Sharon J. Peacock<sup>1,2,3,4</sup>

<sup>1</sup> University of Cambridge, Department of Medicine, Box 157 Addenbrooke's Hospital, Hills Road, Cambridge, CB2 0QQ, United Kingdom

<sup>2</sup> Wellcome Trust Sanger Institute, Wellcome Trust Genome Campus, Hinxton, Cambridge, United Kingdom

<sup>3</sup> University College London, Cruciform Building, London WC1E 6BT, United Kingdom

<sup>4</sup> London School of Hygiene and Tropical Medicine, London WC1E 7HT, United Kingdom

\*To whom correspondence should be addressed: Kim Judge, email: [kj273@medschl.cam.ac.uk](mailto:kj273@medschl.cam.ac.uk)

## Introduction

The Oxford Nanopore MinION is a commercially available long read sequencer that connects to a personal computer through a USB port. Early versions of the technology showed promise for microbiological applications, including the delineation of position and structure of bacterial antibiotic resistance islands, (Ashton et al., 2014) and assembly of bacterial genomes (Loman, Quick and Simpson, 2015, Risse et al., 2015). This has been supported by the development of analysis tools for MinION data. Our objective was to compare and contrast the accuracy and characteristics of open source software for the assembly of bacterial genomes (including plasmids) generated by the MinION instrument.

Our analysis was based on a multidrug resistant *Enterobacter kobei* isolate cultured from wastewater in the United Kingdom in 2015. Genomic DNA was first sequenced using a standard protocol on the Illumina HiSeq 2000 and the short read data was

assembled into ninety contigs using a Velvet-based pipeline (Zerbino and Birney, 2008). This identified a carbapenemase gene (*bla<sub>OXA-48</sub>*) located on a 2.5kb contig, but was insufficient to provide conclusive information on the presence and structure of plasmids. We then sequenced genomic DNA on a single MinION flow cell to determine whether long reads would allow us to resolve the structure of any plasmids present.

## Methods

### Wastewater processing and bacterial identification

Untreated wastewater was collected from a treatment plant in the UK. An *Enterobacter kobei* isolate was cultured using standard filtration and culture methods. Antimicrobial susceptibility testing was determined using the N206 card on the Vitek 2 instrument (bioMérieux, Marcy l'Étoile, France) calibrated against EUCAST breakpoints.

### Illumina sequencing and bioinformatic analyses

DNA extraction and library preparation was performed as previously described. (Quail et al., 2012) DNA libraries were sequenced using the HiSeq platform (Illumina Inc.) to generate 100 bp paired-end reads. *De novo* assemblies were generated using Velvet (Zerbino and Birney, 2008) to create several assemblies by varying the kmer size. The assembly with the best N50 was chosen and contigs smaller than 300 bases were removed. The scaffolding software SSPACE was employed (Boetzer et al., 2010) and assemblies further improved using 120 iterations of GapFiller (Boetzer and Pirovano, 2012). Species identification was based on analysis of *hsp60* and *rpoB*, as previously described (Hoffmann and Roggenkamp, 2003). To detect acquired genes encoding antimicrobial resistance, a manually curated version of the ResFinder database (compiled in 2012) (Zankari et al., 2012) was used. Assembled sequences were compared to this as described previously (Reuter et al., 2013).

### MinION sequencing and bioinformatic analysis

DNA extraction was carried out using the QiaAMP DNA Mini kit (Qiagen, Venlo, Netherlands) following the manufacturers instructions. DNA was quantified using the Qubit fluorimeter (Life Technologies, Paisley, UK) following the manufacturer's protocol. Sample preparation was carried out using the Genomic DNA Sequencing Kit SQK-MAP-006 (Oxford Nanopore Technologies, Oxford, UK) following the manufacturers instructions, including the optional NEBNext FFPE DNA repair step (NEB, Ipswich, USA. 6µL pre-sequencing mix was combined with 4µL Fuel Mix (Oxford Nanopore), 75µL running buffer (Oxford Nanopore) and 66µL water and added to the flow cell. The 48-hour genomic DNA sequencing script run in MinKNOW V0.50.2.15 using the 006 workflow. Metrichor V2.33.1 was used for basecalling. The flow cell was reloaded at 24 hours with the pre-sequencing mix prepared as above. MinION and Illumina sequence data have been deposited in the European Nucleotide Archive (Data citation 1)

Basecalled MinION reads were converted from FAST5 to FASTQ formats using the Python script fast52fastq.py. Read mapping was carried out to assess quality of data and coverage using the BWA-MEM algorithm of BWA v0.7.12 with the flag `-x ont2d` (Li, 2013). Output SAM files from BWA-MEM were converted to sorted BAM files using SAMtools v0.1.19-44428cd (Li et al., 2009). Assembly using MinION data only was undertaken using PBcR (Koren et al., 2012), Canu (Berlin et al., 2015) and miniasm (Li, 2016). Canu version 1.0 was run using the commands `maxThreads=8 maxMemory=16 -useGrid=0 -nanopore-raw`. PBcR pipeline with CA version 8.3rc2 was run using the options `-length 500 -partitions 200` and the spec file shown in Text file 1. Minimap and miniasm were run as specified (Li, 2016). The resulting assembly was polished using Nanopolish v0.4.0 with settings as specified (Loman, Quick and Simpson, 2015), with Poretools (Loman and Quinlan, 2014) used to extract fasta sequences from fast5 files in format required by nanopolish using the option `fasta`. Hybrid assemblies were generated using SPAdes 3.6.0 (Bankevich et al., 2012) using the option `--careful`, then filtered to exclude contigs of less than 1kb. All assemblies were assessed against the manually finished assembly using QUAST (Gurevich et al., 2013) version 3.2 (supplementary table 1). Assemblies were annotated using Prokka (Seemann, 2014). Figures were generated using `multi_act_cartoon.py` (GitHub, 2016)

and MUMmer (Kurtz et al., 2004) version 3.23. Assemblies and scripts are available online (Data citation 2)

### **Manually finished genome**

Assemblies were generated using Canu and SPAdes as described above. A gap5 database was made using corrected MinION pass reads from the Canu pipeline and Illumina reads. Manual finishing was undertaken using gap5 (Bonfield and Whitwham, 2010) version 1.2.14 making one chromosome and nine plasmids. Icorn2 (Otto et al., 2010) was run on this for 5 iterations. The start positions of the chromosome and plasmids were fixed using circlator (Hunt et al., 2015) 1.2.0 using the command `circlator fixstart`. This assembly was annotated using Prokka (Seemann, 2014). The assembly and annotation is available online (Data citation 3)

### **Results**

Raw data was initially analysed using the Oxford Nanopore basecalling software and defined as pass or fail based on a threshold set at approximately 85% accuracy (Q9) and including only 2D reads - where data is generated from both the forward and reverse strand of DNA as it passes through the nanopore. The error rate of MinION pass data exceeded that of the Illumina data (0.048 insertions, 0.027 deletions and 0.089 substitutions per base for MinION, compared to 5.8e-06 insertions, 9.2e-06 deletions and 0.0025 substitutions for Illumina). Three tools (PBcR (Koren et al., 2012), Canu (Berlin et al., 2015), and miniasm (Li, 2016)) were used to assemble MinION pass reads alone, and a fourth (SPAdes (Bankevich et al., 2012)) was used on the combination of MinION pass data and Illumina data to produce a hybrid assembly. PBcR and Canu perform a self-correction step on reads before generating an assembly, whereas miniasm assembles the reads as provided.

All four assemblies had a similar number of contigs, and were more contiguous than the assembly using Illumina data alone, with SPAdes producing a single chromosomal contig (Table 1). We ran QUAST (Gurevich et al., 2013) to assess the quality of the assemblies, but found that it could not report all statistics for the miniasm assembly as this fell below the cut-offs for this tool. We used nanopolish

(Loman, Quick and Simpson, 2015) to correct the miniasm assembly using the raw current signal (pre-basecalling) to obtain higher accuracy, and noted that the miniasm & nanopolish assembly had a similar number of indels per kilobase to Canu, although it still had more SNPs per kb (Table 1).

Next, we compared the four assemblies to evaluate their ability to accurately reflect the genome structure. A manually finished assembly was produced and used as a reference, from which a single large inversion between the SPAdes assembly and the manually finished assembly was identified (Fig. 1). SPAdes also incorrectly integrated a plasmid into the chromosomal contig, caused by false joins. PBcR made a number of rearrangements compared to Canu (Fig. 1), validating that Canu is an improvement over its predecessor PBcR.

Next, we evaluated assembly of all (pass and fail) MinION reads using miniasm and Canu to determine whether adding additional (lower-quality) data would improve the assembly. Adding fail data increased the number of reads by almost 50% (64497 vs. 43260) but reduced the mean read length from 5221bp to 4687bp. Miniasm run on all reads produced the same number of contigs and a similar mean contig size as when run on pass reads. The longest contig produced with Canu was smaller when using all reads versus pass reads alone (Supplementary Table 1). With Canu, using pass reads alone led to more reads at the correction step compared to using all reads (35913 vs. 30728), indicating working with all reads could cause good quality data to be discarded during the read correction process. In both cases, using all reads did not produce a single chromosomal contig. We concluded from this that adding fail data did not consistently improve assembly.

We considered the time taken to generate sequence data, together with memory requirements to compute the assembly (Table 1). We found that almost 50% of pass reads were generated in the first 6 hours, almost 80% within 9 hours, and 90% within 12 hours. This gave a theoretical coverage of 20x, 32x and 37x, respectively. Only 31 pass reads were generated in the final 12 hours of the 48-hour run (<0.1%). Using pass reads from the first 6 hours alone led to a less accurate, fragmented

assembly, but subsets of pass reads taken from the first 9 or 12 hours of the run generated comparable assemblies to pass data from the full 48-hour run (Supplementary Table 1). We also compared speed of analysis. Miniasm completed assembly within two minutes, but the trade off from using this alone was lower accuracy (Table 1). Nanopolish improved the quality of the miniasm assembly but took over three days to run; Canu took two hours and produced comparable results to the miniasm assembly after nanopolish. With current methods, isolate to assembled data in less than 48 hours is realistic. Limiting steps remaining are the requirement for overnight growth of colonies, and variable quality of flow cells.

We then evaluated the performance of the MinION to identify the presence and position of genes associated with clinically significant drug resistance in the *E. kobei* genome. HiSeq data had detected *bla*<sub>OXA-48</sub> encoding carbapenem resistance on a 2.5kb contig and additional antimicrobial resistance genes in a separate 8.7kb contig (*sul1*, *arr*, *aac3* and *aac6'-IIC*, which encode resistance to sulphonamides, rifampicin and aminoglycosides, respectively), but it was unclear whether these were on the same plasmid, two different plasmids, or chromosomally integrated. All assemblies using MinION data identified the carbapenemase *bla*<sub>OXA-48</sub> on a contig with plasmid genes. The other resistance genes were identified in proximity to each other on a single large contig along with heavy metal resistance genes and plasmid genes. However, the SPAdes assembly misassembled this region into the chromosomal contig (5Mb). We concluded that there are two separate plasmids carrying resistance determinants of interest.

## Conclusion

MinION data alone was able to generate highly contiguous bacterial assemblies. Illumina data remains the cheapest way to create an assembly per sample, and still has the highest sequence accuracy, but is not without drawbacks, including the capital expenditure on the instrument or the need to outsource sequencing to a sequencing provider (which may increase turnaround time). MinION has low start-up costs, but is currently more expensive per sample. The relative ease of workflow and inexpensive laboratory set-up could facilitate its integration into routine practice,

subject to improvement in reliability and reduction of MinION running cost. Whole genome sequencing is equally effective irrespective of genus, meaning that these methods could also track dissemination of plasmids containing carbapenemase genes in species such as *Pseudomonas aeruginosa*. MinION only assemblies were of sufficient quality to detect and characterise regions of antimicrobial resistance and could be generated rapidly in an outbreak.

## Acknowledgements

We gratefully acknowledge Catherine Ludden, Theo Gouliouris and the staff at the wastewater treatment plant for assistance in sample collection. We are grateful for assistance from the library construction, sequencing and core informatics teams at the Wellcome Trust Sanger Institute. We thank Simon Harris for his advice on assembling long-read data, and the staff at Oxford Nanopore for their technical support and advice during the MinION Access Program.

## Funding

This publication presents independent research supported by the Health Innovation Challenge Fund (WT098600, HICF-T5-342), a parallel funding partnership between the Department of Health and Wellcome Trust. The views expressed in this publication are those of the author(s) and not necessarily those of the Department of Health or Wellcome Trust.

## Conflict of Interest

KJ is a member of the MinION Access Program and received free of charge reagents for MinION sequencing presented in this study. All other authors: none to declare.

## References

Ashton, P., Nair, S., Dallman, T., Rubino, S., Rabsch, W., Mwaigwisya, S., Wain, J. and O'Grady, J. (2014). MinION nanopore sequencing identifies the position and structure of a bacterial antibiotic resistance island. *Nat Biotechnol*, 33(3), pp.296-300.

Bankevich, A., Nurk, S., Antipov, D., Gurevich, A., Dvorkin, M., Kulikov, A., Lesin, V., Nikolenko, S., Pham, S., Prjibelski, A., Pyshkin, A., Sirotkin, A., Vyahhi, N., Tesler, G., Alekseyev, M. and Pevzner, P. (2012). SPAdes: A New Genome Assembly Algorithm and Its Applications to Single-Cell Sequencing. *Journal of Computational Biology*, 19(5), pp.455-477.

Berlin, K., Koren, S., Chin, C., Drake, J., Landolin, J. and Phillippy, A. (2015). Assembling large genomes with single-molecule sequencing and locality-sensitive hashing. *Nat Biotechnol*, 33(6), pp.623-630.

Boetzer, M., Henkel, C., Jansen, H., Butler, D. and Pirovano, W. (2010). Scaffolding pre-assembled contigs using SSPACE. *Bioinformatics*, 27(4), pp.578-579.

Boetzer, M. and Pirovano, W. (2012). Toward almost closed genomes with GapFiller. *Genome Biol*, 13(6), p.R56.

Bonfield, J. and Whitwham, A. (2010). Gap5--editing the billion fragment sequence assembly. *Bioinformatics*, 26(14), pp.1699-1703.

GitHub. (2016). *martinghunt/bioinf-scripts*. [online] Available at: [https://github.com/martinghunt/bioinf-scripts/blob/master/python/multi\\_act\\_cartoon.py](https://github.com/martinghunt/bioinf-scripts/blob/master/python/multi_act_cartoon.py) [Accessed 17 May 2016].

Gurevich, A., Saveliev, V., Vyahhi, N. and Tesler, G. (2013). QUAST: quality assessment tool for genome assemblies. *Bioinformatics*, 29(8), pp.1072-1075.

Hoffmann, H. and Roggenkamp, A. (2003). Population Genetics of the Nomenspecies *Enterobacter cloacae*. *Applied and Environmental Microbiology*, 69(9), pp.5306-5318.

Hunt, M., Silva, N., Otto, T., Parkhill, J., Keane, J. and Harris, S. (2015). Circlator:



automated circularization of genome assemblies using long sequencing reads.

*Genome Biol*, 16(1).

Koren, S., Schatz, M., Walenz, B., Martin, J., Howard, J., Ganapathy, G., Wang, Z., Rasko, D., McCombie, W., Jarvis, E. and Phillippy, A. (2012). Hybrid error correction and de novo assembly of single-molecule sequencing reads. *Nat Biotechnol*, 30(7), pp.693-700.

Kurtz S Phillippy A, Delcher AL, Smoot M, Shumway M, Antonescu C, Salzberg SL. Versatile and open software for comparing large genomes. *Genome Biology* (2004), 5:R12.

Li, H., Handsaker, B., Wysoker, A., Fennell, T., Ruan, J., Homer, N., Marth, G., Abecasis, G. and Durbin, R. (2009). The Sequence Alignment/Map format and SAMtools. *Bioinformatics*, 25(16), pp.2078-2079.

Li, H. (2013) Aligning sequence reads, clone sequences and assembly contigs with BWA-MEM. arXiv:1303.3997v1 [q-bio.GN]

Loman, N. and Quinlan, A. (2014). Poretools: a toolkit for analyzing nanopore sequence data. *Bioinformatics*, 30(23), pp.3399-3401.

Loman, N., Quick, J. and Simpson, J. (2015). A complete bacterial genome assembled de novo using only nanopore sequencing data. *Nature Methods*, 12(8), pp.733-735.

Otto, T., Sanders, M., Berriman, M. and Newbold, C. (2010). Iterative Correction of Reference Nucleotides (iCORN) using second generation sequencing technology. *Bioinformatics*, 26(14), pp.1704-1707.

Quail, M., Smith, M., Coupland, P., Otto, T., Harris, S., Connor, T., Bertoni, A., Swerdlow, H. and Gu, Y. (2012). A tale of three next generation sequencing platforms: comparison of Ion torrent, pacific biosciences and illumina MiSeq

sequencers. *BMC Genomics*, 13(1), p.341.

Reuter, S., Ellington, M., Cartwright, E., Köser, C., Török, M., Gouliouris, T., Harris, S., Brown, N., Holden, M., Quail, M., Parkhill, J., Smith, G., Bentley, S. and Peacock, S. (2013). Rapid Bacterial Whole-Genome Sequencing to Enhance Diagnostic and Public Health Microbiology. *JAMA Internal Medicine*, 173(15), p.1397.

Risse, J., Thomson, M., Patrick, S., Blakely, G., Koutsovoulos, G., Blaxter, M. and Watson, M. (2015). A single chromosome assembly of *Bacteroides fragilis* strain BE1 from Illumina and MinION nanopore sequencing data. *GigaScience*, 4(1).

Seemann, T. (2014). Prokka: rapid prokaryotic genome annotation. *Bioinformatics*, 30(14), pp.2068-2069.

Zankari, E., Hasman, H., Cosentino, S., Vestergaard, M., Rasmussen, S., Lund, O., Aarestrup, F. and Larsen, M. (2012). Identification of acquired antimicrobial resistance genes. *Journal of Antimicrobial Chemotherapy*, 67(11), pp. 2640-2644.

Zerbino, D. and Birney, E. (2008). Velvet: Algorithms for de novo short read assembly using de Bruijn graphs. *Genome Research*, 18(5), pp.821-829.

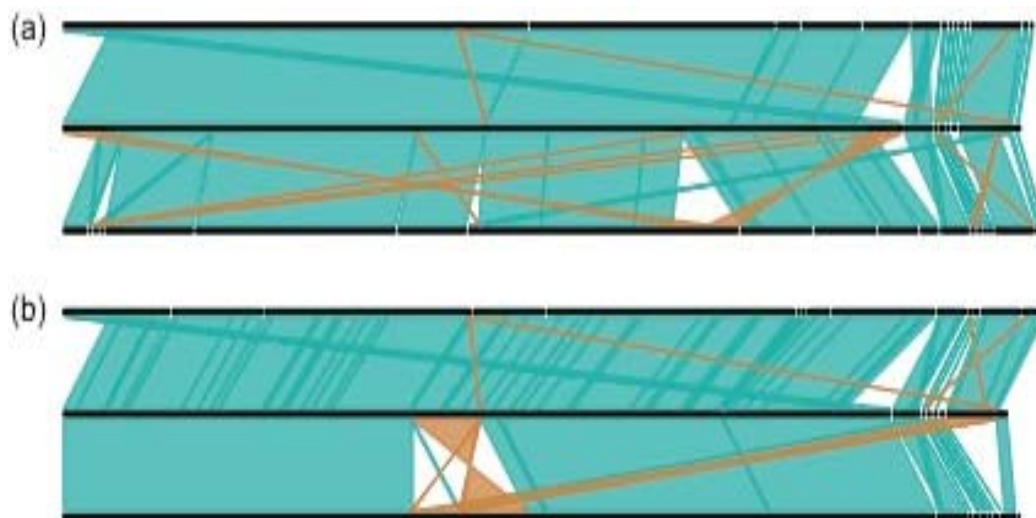

Figure 1. Comparison between (a) Canu, manually finished and PBcR assemblies and (b) miniasm & nanopolish, manually finished and SPAdes hybrid assemblies. Nucmer matches are shown where the length of the match is greater than 10kb or 50% of the length of the shortest sequence it matches. Forward and reverse matches are colored green and brown, respectively.

Table 1. Comparison of assembly software: number and size of contigs, errors, and time/memory requirements.

| Assembly               | PBcR    | Canu    | Miniasm                | Miniasm & Nanopolish | SPAdes  | Illumina | Manually finished |
|------------------------|---------|---------|------------------------|----------------------|---------|----------|-------------------|
| Number of Contigs      | 21      | 15      | 16                     | 16                   | 13      | 90       | 10                |
| Number of Bases        | 5490929 | 5542520 | 5843777                | 5673354              | 5576147 | 5454767  | 5586413           |
| Largest contig (bases) | 1615977 | 2782732 | 1548218                | 1504104              | 5303011 | 686305   | 5031167           |
| Mean contig (bases)    | 261473  | 369501  | 365236                 | 354585               | 428934  | 60608    | 620713            |
| N50*                   | 1197808 | 2782732 | 661959                 | 641515               | 5303011 | 153115   | 5031167           |
| Total mis-assemblies   | 5       | 2       | 0<br>(analysis failed) | 3                    | 5       | 6        | n/a               |
| Mismatches per kb      | 1.0038  | 0.3494  | 6.6578                 | 5.4843               | 0.0371  | 0.0355   | n/a               |
| Indels per kb          | 12.1668 | 7.769   | 18.6418                | 8.987                | 0.0353  | 0.0322   | n/a               |
| Memory requirement     | 7GB     | 8GB     | 3GB                    | 3GB & 4GB            | 2GB     | 4GB      | n/a               |
| Run time               | 8hr     | 2hr     | 2 min                  | 2 min & 3 days 11 hr | 3hr     | 3hr      | n/a               |
| Total CPU time**       | 79728   | 54745   | 124                    | 9450274              | 9164    | 12514    | n/a               |
| Number of threads      | 16      | 8       | 2                      | 2 & 16               | 16      | 2        | n/a               |

\*N50: a weighted median statistic. Half (50%) of the assembly is contained in contigs greater than or equal to a contig of this size

\*\* Total CPU (Central Processing Unit) time: The amount of time used by the CPUs actively processing instructions. Run time, or “real” time, may be longer, as it includes idle time or time spent waiting for input or output, or may be shorter if the workload is shared between more than one CPU.

**Text 1: Spec file used to run PBcR**

ovlMemory = 16

ovlStoreMemory= 16000

merylMemory = 16000

ovlThreads = 4

threads=4

merSize=14

falconForce=1

falconOptions=--max\_n\_read 200 --min\_idt 0.50 --output\_multi --  
local\_match\_count\_threshold 0

asmOvlErrorRate = 0.3

asmUtgErrorRate = 0.3

asmCgwErrorRate = 0.3

asmCnsErrorRate = 0.3

asmOBT=0

batOptions=-RS -CS

utgGraphErrorRate = 0.3

utgMergeErrorRate = 0.3
